# Supplementary material for: Stigma and its associated factors among patients with COVID-19 in Dhaka City: evidence from a cross-sectional investigation
Source: PeerJ. 2022 Oct 6;10:e14092. doi: 10.7717/peerj.14092 (PMC9548314; doi:10.7717/peerj.14092)
Supplement: Supplemental Information 2 [file peerj-10-14092-s002.xlsx]

## Sheet: Raw Data
Sex	Age	Marital	Edu	Occup	Income	Relig	Hospitalization	Stigma_1	Stigma_2	Stigma_3	Stigma_4	Stigma_5	Stigma_6	Stigma_7	Stigma_8	Stigma_9	Stigma_10	Stigma_11	Stigma_12	Stigma_13	Stigma_14	Stigma_15	EnactedStigma_Score	DisclosConcern_Score	InternalStigma_Score	ExternalStigma_Score	TotalStigma_Score
1	2	2	1	1	1	1	1	2	2	2	2	1	1	1	2	1	2	2	0	0	2	2	6	3	4	9	22
1	2	2	2	1	1	1	1	0	2	1	2	0	1	1	2	0	2	1	1	2	1	2	3	2	4	9	18
1	2	2	2	1	1	1	1	2	2	2	1	1	1	1	1	1	2	2	1	1	2	2	6	2	3	11	22
1	1	2	3	1	1	1	1	3	2	1	3	1	1	1	2	2	2	2	2	2	2	2	6	4	4	14	28
1	2	2	3	1	1	1	1	2	2	2	1	1	2	2	2	1	2	2	1	2	2	2	6	2	6	12	26
1	2	2	3	1	1	1	1	2	2	2	1	1	0	0	1	1	2	2	1	2	2	2	6	2	1	12	21
1	2	2	3	1	1	1	1	1	2	1	2	1	1	1	1	1	2	1	1	1	2	2	4	3	3	10	20
1	1	1	4	1	1	1	1	2	2	2	1	1	1	1	2	1	2	2	1	2	2	3	6	2	4	13	25
1	3	1	4	1	1	1	1	2	2	1	1	1	2	1	2	1	2	1	1	1	2	2	5	2	5	10	22
1	1	2	4	1	1	1	1	2	2	2	3	1	1	1	1	1	1	1	1	1	2	2	6	4	3	9	22
1	1	2	4	1	1	1	1	2	1	1	1	1	1	1	1	1	2	2	1	2	2	2	4	2	3	12	21
1	1	2	4	1	1	1	1	1	2	1	1	0	0	0	1	0	1	1	1	1	1	1	4	1	1	6	12
1	1	2	4	1	1	1	1	1	1	1	1	1	1	1	3	1	2	2	1	2	2	2	3	2	5	12	22
1	1	2	4	1	1	1	1	2	2	2	2	1	2	1	1	2	1	2	1	2	2	3	6	3	4	13	26
1	1	2	4	1	1	1	1	2	2	2	3	1	1	1	3	1	3	3	2	3	2	2	6	4	5	16	31
1	2	2	4	1	1	1	1	2	2	2	1	0	1	1	0	1	2	1	1	2	2	3	6	1	2	12	21
1	2	2	4	1	1	1	1	1	1	1	1	0	2	2	3	1	1	1	1	1	1	1	3	1	7	7	18
1	2	2	4	1	1	1	1	2	2	0	1	1	1	1	1	1	1	1	1	2	2	2	4	2	3	10	19
1	2	2	4	1	1	1	1	2	2	0	2	2	2	1	2	1	2	0	0	1	2	2	4	4	5	8	21
1	2	2	4	1	1	1	1	2	2	1	2	2	2	2	3	1	1	1	1	1	1	1	5	4	7	7	23
1	2	2	4	1	1	1	1	1	2	0	1	1	1	1	1	1	2	1	2	1	1	2	3	2	3	10	18
1	2	2	4	1	1	1	1	1	1	1	0	0	1	1	1	1	2	2	1	1	1	2	3	0	3	10	16
1	2	2	4	1	1	1	1	2	2	2	1	1	1	1	1	1	2	2	2	2	2	2	6	2	3	13	24
1	2	2	4	1	1	1	1	2	1	1	1	1	1	1	2	1	2	1	1	2	2	2	4	2	4	11	21
1	2	2	4	1	1	1	1	1	2	2	1	1	0	0	1	0	1	1	0	1	1	1	5	2	1	5	13
1	3	2	4	1	1	1	1	1	1	1	3	2	2	2	2	1	2	2	1	1	2	2	3	5	6	11	25
1	3	2	4	1	1	1	1	1	2	2	1	1	1	1	2	1	2	2	1	1	2	2	5	2	4	11	22
1	3	2	4	1	1	1	1	3	2	2	2	1	2	1	2	0	2	1	1	2	3	2	7	3	5	11	26
1	3	2	1	2	1	1	1	2	1	1	1	1	1	0	1	1	2	2	1	2	2	2	4	2	2	12	20
1	3	2	1	3	1	1	1	2	2	1	1	0	0	0	0	1	2	2	2	2	2	3	5	1	0	14	20
1	2	2	2	3	1	1	1	1	2	1	2	1	1	1	2	1	2	2	1	1	1	2	4	3	4	10	21
1	3	2	2	3	1	1	1	2	2	1	1	0	1	1	1	3	0	2	2	2	1	2	5	1	3	12	21
1	3	2	2	3	1	1	1	1	1	1	2	2	1	1	1	1	2	2	1	2	2	2	3	4	3	12	22
1	3	2	2	3	1	1	1	2	2	2	1	1	1	1	1	1	2	2	1	2	2	2	6	2	3	12	23
1	2	2	3	3	1	1	1	2	2	1	2	1	2	2	1	1	1	2	1	1	2	2	5	3	5	10	23
1	3	2	3	3	1	1	1	2	2	1	2	1	0	0	0	1	2	2	1	1	1	2	5	3	0	10	18
1	3	2	3	3	1	1	1	2	1	1	2	1	1	1	1	1	1	2	1	1	2	2	4	3	3	10	20
1	3	2	3	3	1	1	1	2	2	2	1	1	2	2	3	1	1	1	1	1	1	1	6	2	7	7	22
1	2	2	4	3	1	1	1	2	2	1	1	0	0	0	1	0	1	1	1	1	1	1	5	1	1	6	13
1	2	2	4	3	1	1	1	2	2	1	1	1	1	2	1	1	2	2	1	1	2	2	5	2	4	11	22
1	2	2	4	3	1	1	1	1	2	1	1	1	2	2	2	1	2	1	1	1	2	2	4	2	6	10	22
1	2	2	4	3	1	1	1	2	2	2	2	0	0	0	0	2	3	2	2	2	2	2	6	2	0	15	23
1	3	2	4	3	1	1	1	1	2	1	2	2	1	1	1	1	2	1	1	1	2	2	4	4	3	10	21
1	3	2	4	3	1	1	1	2	2	1	2	2	1	1	1	1	1	1	1	1	1	1	5	4	3	7	19
1	3	2	4	3	1	1	1	1	2	1	1	1	1	1	1	1	2	2	1	2	2	2	4	2	3	12	21
1	3	2	4	3	1	1	1	2	2	3	3	1	1	1	2	1	2	2	2	2	2	2	7	4	4	13	28
1	3	2	4	3	1	1	1	2	2	2	1	1	1	1	2	1	2	2	2	2	2	2	6	2	4	13	25
1	3	2	4	3	1	1	1	2	2	2	1	1	1	1	1	0	1	1	1	1	1	1	6	2	3	6	17
1	3	2	4	3	1	1	1	2	2	1	0	1	0	0	1	1	1	1	1	1	1	1	5	1	1	7	14
1	2	2	1	4	1	1	1	1	2	1	1	1	1	1	1	1	1	1	1	2	2	3	4	2	3	11	20
1	2	2	2	4	1	1	1	1	2	1	1	2	1	1	2	1	2	1	1	2	2	2	4	3	4	11	22
1	1	2	3	4	1	1	1	1	1	1	1	1	2	2	2	1	2	2	1	2	2	2	3	2	6	12	23
1	2	2	3	4	1	1	1	1	1	2	2	1	2	1	1	1	2	3	1	1	2	3	4	3	4	13	24
1	1	2	4	4	1	1	1	2	2	1	1	1	2	1	2	1	1	1	1	1	1	1	5	2	5	7	19
1	2	2	4	4	1	1	1	0	1	1	0	1	0	0	1	0	2	2	1	2	2	3	2	1	1	12	16
1	2	2	4	4	1	1	1	2	2	1	1	1	1	1	1	1	1	1	1	1	1	1	5	2	3	7	17
1	3	2	4	4	1	1	1	1	1	1	1	1	1	1	1	1	2	2	2	2	2	2	3	2	3	13	21
1	3	2	4	4	1	1	1	1	2	1	1	1	1	1	1	1	2	2	2	2	2	2	4	2	3	13	22
1	3	2	4	4	1	1	1	2	2	2	1	1	1	1	1	1	2	1	1	1	2	2	6	2	3	10	21
1	3	2	4	4	1	1	1	1	1	1	1	1	1	2	2	1	2	1	1	2	2	2	3	2	5	11	21
1	2	2	3	5	1	1	1	1	1	3	1	2	1	2	1	2	2	2	2	2	2	2	5	3	4	14	26
1	1	1	4	5	1	1	1	2	2	1	1	1	1	1	1	1	2	2	2	1	2	3	5	2	3	13	23
1	1	1	3	6	1	1	1	2	2	2	2	1	2	1	2	1	2	1	1	2	2	2	6	3	5	11	25
1	1	1	3	6	1	1	1	1	2	1	1	1	2	2	3	1	2	1	1	1	1	2	4	2	7	9	22
1	1	1	3	6	1	1	1	2	2	2	2	1	0	0	1	1	2	2	1	1	2	2	6	3	1	11	21
1	1	1	4	6	1	1	1	1	2	1	2	1	1	1	1	1	1	2	2	2	2	2	4	3	3	12	22
1	2	2	4	1	1	2	1	2	2	1	2	1	2	1	1	1	1	1	1	1	1	2	5	3	4	8	20
1	3	2	4	1	1	2	1	1	2	1	2	1	1	1	1	1	2	2	1	1	2	2	4	3	3	11	21
1	3	2	4	1	1	2	1	2	1	1	1	1	1	1	1	1	1	1	1	2	2	2	4	2	3	10	19
1	2	2	2	3	1	2	1	1	1	1	1	1	1	1	2	1	2	2	2	2	2	2	3	2	4	13	22
1	2	2	3	4	1	2	1	2	2	1	1	2	1	2	2	1	1	1	1	1	2	2	5	3	5	9	22
1	2	2	4	5	1	4	1	2	2	2	1	2	1	1	2	1	2	2	0	1	2	2	6	3	4	10	23
1	1	1	4	1	2	1	1	2	2	2	1	3	1	1	1	1	3	2	1	2	3	2	6	4	3	14	27
1	2	1	4	1	2	1	1	2	2	1	2	2	0	0	0	1	1	1	1	1	1	1	5	4	0	7	16
1	1	2	4	1	2	1	1	2	3	3	0	0	0	0	1	1	2	2	1	2	2	2	8	0	1	12	21
1	1	2	4	1	2	1	1	2	2	2	2	1	1	0	2	0	2	2	0	2	2	2	6	3	3	10	22
1	1	2	4	1	2	1	1	1	2	1	2	0	1	1	2	1	2	2	1	2	2	2	4	2	4	12	22
1	1	2	4	1	2	1	1	1	2	1	1	1	1	1	2	1	1	1	1	1	1	2	4	2	4	8	18
1	1	2	4	1	2	1	1	2	2	1	1	1	0	0	0	1	1	1	1	1	1	1	5	2	0	7	14
1	2	2	4	1	2	1	1	1	1	1	2	2	1	1	1	1	1	1	1	2	2	2	3	4	3	10	20
1	2	2	4	1	2	1	1	1	2	1	1	1	1	1	1	1	2	2	2	2	2	2	4	2	3	13	22
1	2	2	4	1	2	1	1	2	2	2	3	1	1	2	2	0	2	1	1	1	2	2	6	4	5	9	24
1	2	2	4	1	2	1	1	1	2	2	1	0	0	0	1	1	1	1	1	1	1	1	5	1	1	7	14
1	2	2	4	1	2	1	1	1	2	2	1	0	0	0	1	1	1	1	1	1	1	1	5	1	1	7	14
1	2	2	4	1	2	1	1	2	2	1	2	2	0	0	1	1	1	1	0	1	1	1	5	4	1	6	16
1	2	2	4	1	2	1	1	1	2	1	1	0	0	0	0	0	1	1	1	1	1	1	4	1	0	6	11
1	2	2	4	1	2	1	1	1	1	1	1	1	2	1	2	1	2	2	1	2	2	2	3	2	5	12	22
1	2	2	4	1	2	1	1	2	2	3	2	2	2	2	2	1	3	2	2	2	2	2	7	4	6	14	31
1	2	2	4	2	2	1	1	2	2	1	1	1	1	1	1	2	2	2	2	2	2	2	5	2	3	14	24
1	3	2	4	2	2	1	1	1	2	1	1	0	1	0	1	1	2	2	2	1	2	2	4	1	2	12	19
1	3	1	4	3	2	1	1	2	2	2	1	1	1	1	1	1	1	1	1	1	1	1	6	2	3	7	18
1	2	2	4	3	2	1	1	2	2	3	1	1	2	2	3	0	1	0	1	0	1	1	7	2	7	4	20
1	3	2	4	3	2	1	1	2	2	2	1	1	0	0	1	1	1	2	1	2	2	2	6	2	1	11	20
1	3	2	4	3	2	1	1	2	2	2	2	2	2	2	2	1	1	1	1	1	1	1	6	4	6	7	23
1	3	2	4	3	2	1	1	2	2	2	1	1	1	1	1	1	2	2	1	1	2	2	6	2	3	11	22
1	3	2	4	3	2	1	1	1	2	1	2	2	2	2	3	1	1	1	1	1	1	1	4	4	7	7	22
1	3	2	4	3	2	1	1	2	2	2	2	1	2	1	1	2	2	2	1	2	2	1	6	3	4	12	25
1	3	2	4	3	2	1	1	1	2	1	2	2	2	2	3	1	0	1	1	1	1	1	4	4	7	6	21
1	3	2	4	3	2	1	1	2	2	2	2	1	2	1	2	1	2	2	1	2	2	2	6	3	5	12	26
1	3	2	4	3	2	1	1	1	2	1	2	2	2	2	1	1	1	1	1	1	1	1	4	4	5	7	20
1	2	2	4	4	2	1	1	1	2	1	2	2	1	1	1	1	2	1	1	2	1	2	4	4	3	10	21
1	2	2	4	4	2	1	1	2	2	2	2	2	1	1	1	1	2	2	1	2	2	2	6	4	3	12	25
1	2	2	4	4	2	1	1	2	2	1	1	1	1	1	2	1	2	1	1	2	2	2	5	2	4	11	22
1	2	2	4	4	2	1	1	2	2	2	1	0	1	0	2	2	3	3	1	1	2	3	6	1	3	15	25
1	2	2	4	4	2	1	1	2	2	2	2	1	1	1	1	1	2	2	1	2	2	2	6	3	3	12	24
1	2	2	4	4	2	1	1	1	2	1	2	2	1	1	1	1	2	1	1	2	2	2	4	4	3	11	22
1	2	2	4	4	2	1	1	1	2	1	1	2	2	1	2	1	1	1	1	2	1	2	4	3	5	9	21
1	3	2	4	4	2	1	1	2	2	2	2	2	1	1	3	2	3	3	2	2	3	3	6	4	5	18	33
1	3	2	4	4	2	1	1	1	2	1	2	2	2	1	2	1	1	1	1	1	2	2	4	4	5	9	22
1	1	2	4	5	2	1	1	3	2	2	2	2	2	1	2	1	2	2	2	2	2	2	7	4	5	13	29
1	1	2	4	5	2	1	1	2	2	3	1	1	1	1	2	1	2	2	1	2	2	2	7	2	4	12	25
1	1	1	3	6	2	1	1	2	2	2	1	1	2	1	1	1	2	2	2	2	2	2	6	2	4	13	25
1	2	2	4	1	2	2	1	2	2	2	1	1	1	1	2	1	2	1	1	2	2	2	6	2	4	11	23
1	2	2	4	3	2	2	1	2	2	1	1	1	1	0	2	2	2	1	1	2	2	2	5	2	3	12	22
1	2	2	4	1	3	1	1	1	2	2	1	0	2	1	2	0	1	1	0	1	1	1	5	1	5	5	16
1	3	2	4	1	3	1	1	1	2	1	1	1	1	1	1	1	2	1	2	2	2	2	4	2	3	12	21
1	3	2	4	3	3	1	1	1	1	2	1	0	2	1	3	1	1	1	1	1	1	1	4	1	6	7	18
1	2	2	1	1	1	1	2	3	3	2	2	2	1	1	3	1	2	2	2	2	2	3	8	4	5	14	31
1	1	1	3	1	1	1	2	2	2	2	2	1	1	1	1	1	1	1	2	2	2	2	6	3	3	11	23
1	1	1	3	1	1	1	2	1	2	1	1	1	1	1	1	1	1	1	1	1	2	2	4	2	3	9	18
1	1	1	3	1	1	1	2	1	2	1	1	1	1	1	2	1	2	1	1	1	1	2	4	2	4	9	19
1	1	1	4	1	1	1	2	2	2	2	1	1	1	1	3	2	2	2	2	2	2	3	6	2	5	15	28
1	1	1	4	1	1	1	2	2	2	2	2	2	2	1	2	1	2	2	1	2	2	2	6	4	5	12	27
1	1	1	4	1	1	1	2	2	2	1	3	1	1	1	1	1	2	2	1	2	2	3	5	4	3	13	25
1	1	2	4	1	1	1	2	2	2	2	2	2	2	2	2	2	2	2	1	2	0	2	6	4	6	11	27
1	1	2	4	1	1	1	2	2	2	3	2	2	2	2	3	2	2	2	2	2	2	2	7	4	7	14	32
1	1	2	4	1	1	1	2	2	2	2	3	1	1	1	1	1	2	2	1	2	2	2	6	4	3	12	25
1	1	2	4	1	1	1	2	2	2	3	2	1	1	1	2	1	2	2	2	2	2	2	7	3	4	13	27
1	1	2	4	1	1	1	2	2	2	2	1	1	1	1	1	1	1	1	1	2	2	2	6	2	3	10	21
1	1	2	4	1	1	1	2	2	2	1	2	1	1	1	1	2	2	2	0	2	2	3	5	3	3	13	24
1	1	2	4	1	1	1	2	1	2	1	1	2	0	0	0	1	1	1	1	1	1	1	4	3	0	7	14
1	1	2	4	1	1	1	2	2	1	1	0	1	0	1	1	1	1	1	1	1	1	1	4	1	2	7	14
1	1	2	4	1	1	1	2	2	2	3	2	2	1	1	1	1	3	2	1	2	2	2	7	4	3	13	27
1	1	2	4	1	1	1	2	2	2	1	1	1	2	1	2	1	1	1	1	1	1	1	5	2	5	7	19
1	1	2	4	1	1	1	2	3	2	1	1	1	1	1	2	1	2	2	1	2	2	2	6	2	4	12	24
1	2	2	4	1	1	1	2	2	2	2	1	1	1	1	1	1	1	1	1	2	2	2	6	2	3	10	21
1	2	2	4	1	1	1	2	2	3	3	1	1	1	1	1	1	1	1	1	1	1	1	8	2	3	7	20
1	3	2	4	1	1	1	2	2	2	2	1	1	1	1	1	1	2	2	1	2	2	2	6	2	3	12	23
1	3	2	4	1	1	1	2	1	2	1	1	1	1	1	2	1	2	2	1	2	2	2	4	2	4	12	22
1	2	2	4	3	1	1	2	2	2	2	3	1	1	1	1	1	2	2	1	1	1	2	6	4	3	10	23
1	3	2	4	3	1	1	2	1	2	2	2	2	1	1	1	1	2	1	1	1	2	2	5	4	3	10	22
1	3	2	4	3	1	1	2	2	2	3	2	1	2	2	2	1	2	2	2	2	3	3	7	3	6	15	31
1	3	2	4	3	1	1	2	1	2	1	1	1	1	1	2	1	2	2	1	2	2	2	4	2	4	12	22
1	3	2	3	4	1	1	2	1	2	1	2	1	1	1	1	1	2	2	1	2	2	2	4	3	3	12	22
1	1	1	4	4	1	1	2	1	2	1	2	1	2	2	2	1	2	3	1	3	1	3	4	3	6	14	27
1	1	2	4	4	1	1	2	2	1	2	1	1	1	1	2	1	2	2	1	2	3	2	5	2	4	13	24
1	1	2	3	5	1	1	2	2	2	2	0	0	2	0	2	1	2	2	1	2	2	2	6	0	4	12	22
1	1	1	4	5	1	1	2	1	2	2	1	1	1	1	2	1	2	1	1	1	2	2	5	2	4	10	21
1	1	2	4	5	1	1	2	2	2	2	1	2	2	2	2	2	3	3	2	2	3	3	6	3	6	18	33
1	1	2	4	5	1	1	2	2	2	3	3	2	1	1	1	2	3	3	2	3	3	3	7	5	3	19	34
1	2	2	4	5	1	1	2	2	2	2	2	2	1	1	1	2	2	3	2	2	2	2	6	4	3	15	28
1	1	1	4	6	1	1	2	1	2	1	2	2	1	1	1	1	1	1	1	1	1	2	4	4	3	8	19
1	1	1	4	6	1	1	2	2	2	1	2	2	2	2	2	1	1	1	2	1	2	2	5	4	6	10	25
1	1	1	4	1	1	2	2	2	2	2	2	1	2	0	1	2	2	2	1	2	3	2	6	3	3	14	26
1	1	2	4	1	1	2	2	3	2	3	1	1	1	1	3	1	2	1	1	2	2	2	8	2	5	11	26
1	1	2	4	5	1	2	2	1	2	2	1	1	1	1	1	0	2	2	0	2	2	2	5	2	3	10	20
1	1	2	4	5	1	4	2	2	2	2	2	2	2	1	1	2	2	2	2	2	2	2	6	4	4	14	28
1	2	2	3	1	2	1	2	1	2	2	1	1	0	0	1	1	1	1	1	1	1	1	5	2	1	7	15
1	1	1	4	1	2	1	2	2	2	2	2	1	1	1	1	2	2	2	1	2	2	2	6	3	3	13	25
1	1	1	4	1	2	1	2	2	2	2	1	1	2	1	2	1	1	1	1	1	2	2	6	2	5	9	22
1	1	1	4	1	2	1	2	2	2	2	2	1	1	2	2	2	2	1	1	1	2	2	6	3	5	11	25
1	1	1	4	1	2	1	2	3	1	3	2	1	1	1	2	2	1	2	2	2	2	2	7	3	4	13	27
1	1	1	4	1	2	1	2	1	1	1	1	1	1	1	1	1	2	2	1	2	2	2	3	2	3	12	20
1	1	2	4	1	2	1	2	2	1	1	0	2	2	2	2	1	1	1	1	2	2	2	4	0	6	10	22
1	1	2	4	1	2	1	2	1	2	1	1	1	1	1	1	1	2	2	1	2	2	2	4	2	3	12	21
1	1	2	4	1	2	1	2	2	0	1	2	2	1	1	1	1	2	2	1	2	2	2	3	4	3	12	22
1	1	2	4	1	2	1	2	2	1	2	1	1	1	1	2	2	2	2	1	2	1	3	5	2	4	13	24
1	1	2	4	1	2	1	2	2	2	2	1	1	1	1	1	1	2	2	1	2	2	2	6	2	3	12	23
1	1	2	4	1	2	1	2	1	2	3	1	2	1	2	3	1	2	2	1	2	2	3	6	3	6	13	28
1	1	2	4	1	2	1	2	2	2	3	2	0	2	1	1	1	2	2	1	2	2	2	7	2	4	12	25
1	1	2	4	1	2	1	2	2	2	1	2	1	1	1	1	1	2	3	1	2	2	2	5	3	3	13	24
1	1	2	4	1	2	1	2	2	2	3	3	2	1	1	3	2	3	3	1	2	2	3	7	5	5	16	33
1	1	2	4	1	2	1	2	2	1	2	2	2	0	0	0	1	1	1	1	1	1	1	5	4	0	7	16
1	2	2	4	1	2	1	2	2	2	2	0	0	1	1	2	1	2	2	1	2	2	2	6	0	4	12	22
1	2	2	4	1	2	1	2	2	2	3	1	1	1	1	2	1	2	2	1	1	1	2	7	2	4	10	23
1	2	2	4	1	2	1	2	1	2	1	2	1	2	1	2	1	1	2	1	1	2	2	4	3	5	10	22
1	2	2	4	1	2	1	2	2	2	1	1	1	1	1	1	1	2	2	2	1	2	3	5	2	3	13	23
1	2	2	4	1	2	1	2	2	2	2	1	1	1	1	2	1	2	2	2	2	2	3	6	2	4	14	26
1	3	2	4	1	2	1	2	2	2	2	0	1	1	1	2	0	2	2	1	2	2	2	6	1	4	11	22
1	2	3	4	1	2	1	2	2	2	2	2	3	1	2	3	1	3	2	1	2	3	3	6	5	6	15	32
1	3	2	4	3	2	1	2	1	2	1	1	0	0	0	1	1	1	1	1	1	1	1	4	1	1	7	13
1	2	2	3	4	2	1	2	2	2	2	2	2	1	1	1	1	1	1	1	1	1	1	6	4	3	7	20
1	2	2	4	4	2	1	2	2	2	2	2	2	2	2	2	2	2	2	2	2	2	3	6	4	6	15	31
1	2	2	4	4	2	1	2	2	2	1	1	0	1	1	1	1	2	2	1	2	2	2	5	1	3	12	21
1	1	1	4	5	2	1	2	2	2	1	1	2	2	2	1	1	2	2	1	2	2	3	5	3	5	13	26
1	1	1	3	6	2	1	2	1	2	1	1	2	1	1	2	1	2	1	1	1	2	2	4	3	4	10	21
1	1	1	3	6	2	1	2	1	2	2	1	1	1	1	1	1	2	2	1	1	2	2	5	2	3	11	21
1	1	1	4	6	2	1	2	2	2	2	1	2	1	1	1	2	2	2	1	1	1	2	6	3	3	11	23
1	1	1	4	1	2	2	2	2	1	3	2	1	2	1	2	1	2	3	1	2	2	2	6	3	5	13	27
1	1	2	4	1	2	2	2	2	2	3	2	2	1	1	1	1	2	2	1	2	3	3	7	4	3	14	28
1	1	2	4	1	2	4	2	1	1	1	2	1	1	1	0	1	1	1	1	1	1	1	3	3	2	7	15
1	1	1	4	1	3	1	2	2	2	1	0	0	1	1	1	1	2	2	2	2	2	2	5	0	3	13	21
1	1	1	4	1	3	1	2	2	2	2	1	1	2	2	2	1	1	2	1	2	2	2	6	2	6	11	25
1	1	1	4	1	3	1	2	2	2	2	1	1	2	2	2	1	2	2	2	2	2	2	6	2	6	13	27
1	1	1	4	1	3	1	2	3	3	2	3	2	1	1	3	2	3	2	2	2	2	3	8	5	5	16	34
1	2	1	4	1	3	1	2	1	2	1	1	1	1	1	1	1	2	2	1	1	2	2	4	2	3	11	20
1	1	2	4	1	3	1	2	1	2	1	2	2	1	1	1	1	2	1	1	2	2	2	4	4	3	11	22
1	1	2	4	1	3	1	2	2	2	2	2	1	1	1	1	1	2	2	2	2	2	2	6	3	3	13	25
1	1	2	4	1	3	1	2	2	2	3	3	2	2	1	3	2	2	2	2	2	2	2	7	5	6	14	32
1	1	2	4	1	3	1	2	2	2	3	3	2	2	2	2	1	2	1	1	1	1	2	7	5	6	9	27
1	2	2	4	1	3	1	2	2	2	1	2	1	1	1	2	1	2	2	1	2	2	3	5	3	4	13	25
1	2	2	4	1	3	1	2	1	2	2	0	0	2	1	2	1	2	2	1	2	2	2	5	0	5	12	22
1	2	2	4	1	3	1	2	2	2	3	1	1	1	1	1	2	2	2	1	2	2	2	7	2	3	13	25
1	2	2	4	1	3	1	2	1	2	1	1	1	1	1	1	1	2	2	2	2	2	2	4	2	3	13	22
1	2	2	4	1	3	1	2	1	1	3	1	1	1	1	1	1	2	1	1	2	3	3	5	2	3	13	23
1	2	2	4	1	3	1	2	2	2	1	1	1	1	1	3	1	2	2	2	1	2	2	5	2	5	12	24
1	3	2	4	3	3	1	2	2	1	2	2	1	0	0	1	1	2	1	1	2	2	2	5	3	1	11	20
1	3	2	4	3	3	1	2	2	3	2	1	1	1	0	0	1	2	2	3	3	3	3	7	2	1	17	27
1	1	1	4	4	3	1	2	2	2	2	2	1	1	1	2	1	3	2	1	2	2	2	6	3	4	13	26
1	2	1	4	4	3	1	2	2	1	1	0	0	1	1	1	1	1	2	1	2	1	3	4	0	3	11	18
1	2	2	4	4	3	1	2	2	2	1	1	1	1	1	1	1	2	2	1	2	2	2	5	2	3	12	22
1	3	2	4	4	3	1	2	2	2	2	2	1	1	1	1	1	2	2	2	2	2	2	6	3	3	13	25
1	1	1	4	5	3	1	2	1	2	1	1	1	1	1	1	1	2	2	1	1	2	2	4	2	3	11	20
1	1	2	4	5	3	1	2	2	2	2	2	2	2	2	2	2	2	2	1	2	2	2	6	4	6	13	29
1	1	2	4	5	3	1	2	2	1	1	1	1	2	1	2	1	2	2	1	1	2	2	4	2	5	11	22
1	1	2	4	5	3	1	2	1	2	2	1	1	1	1	1	1	2	2	1	2	2	2	5	2	3	12	22
1	1	1	3	6	3	1	2	2	2	1	2	1	1	1	2	1	2	2	1	2	2	2	5	3	4	12	24
1	1	1	4	6	3	1	2	2	2	1	1	1	1	1	1	1	1	2	1	2	2	2	5	2	3	11	21
1	1	2	4	6	3	1	2	2	2	1	2	1	1	2	1	1	2	2	1	2	2	2	5	3	4	12	24
1	1	2	4	1	3	2	2	2	2	3	2	2	1	1	3	1	2	2	1	2	2	3	7	4	5	13	29
1	1	2	4	1	3	2	2	2	2	2	2	1	0	0	2	2	2	2	0	0	2	2	6	3	2	10	21
1	1	2	4	1	3	2	2	2	2	3	3	1	1	1	3	1	3	2	2	3	3	3	7	4	5	17	33
2	2	2	1	1	1	1	1	1	1	1	1	1	0	1	1	0	1	1	1	1	1	1	3	2	2	6	13
2	1	2	2	1	1	1	1	2	2	1	1	1	1	1	1	1	2	1	1	2	2	2	5	2	3	11	21
2	2	2	4	1	1	1	1	2	2	1	1	1	1	1	1	1	2	2	1	2	2	2	5	2	3	12	22
2	2	2	4	1	1	1	1	2	2	1	2	2	0	0	0	1	2	2	1	2	2	2	5	4	0	12	21
2	3	2	4	1	1	1	1	2	2	3	3	2	0	0	0	1	3	1	3	2	3	3	7	5	0	16	28
2	1	2	1	2	1	1	1	2	2	1	1	2	1	1	3	3	2	2	3	2	2	3	5	3	5	17	30
2	2	2	1	2	1	1	1	1	1	2	3	1	2	2	3	2	1	2	1	2	2	2	4	4	7	12	27
2	2	2	1	2	1	1	1	2	2	1	0	0	0	0	2	2	2	2	2	2	2	2	5	0	2	14	21
2	3	2	1	2	1	1	1	2	2	3	2	2	2	2	2	1	2	2	2	2	3	3	7	4	6	15	32
2	3	2	1	2	1	1	1	2	2	2	1	1	1	1	2	1	2	2	1	2	2	2	6	2	4	12	24
2	3	2	1	2	1	1	1	1	1	1	3	2	0	0	0	1	2	2	1	2	2	2	3	5	0	12	20
2	1	2	2	2	1	1	1	2	2	2	1	1	1	1	1	1	2	2	0	2	2	2	6	2	3	11	22
2	1	2	2	2	1	1	1	2	2	1	1	2	1	1	2	1	1	1	1	1	2	2	5	3	4	9	21
2	2	2	2	2	1	1	1	2	2	2	1	2	1	2	2	1	2	2	2	2	2	2	6	3	5	13	27
2	2	2	2	2	1	1	1	1	1	1	1	1	1	1	1	1	1	0	0	1	1	1	3	2	3	5	13
2	2	2	2	2	1	1	1	3	3	2	1	1	2	2	2	1	2	1	0	2	2	2	8	2	6	10	26
2	2	2	2	2	1	1	1	2	2	2	2	1	2	1	1	1	1	1	1	1	2	2	6	3	4	9	22
2	3	2	2	2	1	1	1	1	1	1	1	1	1	1	1	0	0	0	0	1	1	1	3	2	3	3	11
2	3	2	2	2	1	1	1	1	1	1	1	1	1	1	1	1	1	3	2	2	2	2	3	2	3	13	21
2	3	2	2	2	1	1	1	2	2	1	1	1	1	1	2	2	2	1	1	1	2	2	5	2	4	11	22
2	3	2	2	2	1	1	1	2	2	3	3	2	0	0	0	1	2	2	1	1	2	2	7	5	0	11	23
2	1	2	3	2	1	1	1	2	2	3	2	1	1	1	2	1	2	2	2	3	3	3	7	3	4	16	30
2	1	2	3	2	1	1	1	2	2	2	2	2	1	2	2	1	1	1	1	2	1	2	6	4	5	9	24
2	1	2	3	2	1	1	1	2	2	2	1	1	1	1	2	1	2	2	2	2	2	2	6	2	4	13	25
2	2	2	3	2	1	1	1	2	2	1	1	1	1	1	2	1	2	2	1	2	2	2	5	2	4	12	23
2	3	2	3	2	1	1	1	2	2	1	2	1	1	1	2	1	2	2	1	2	2	2	5	3	4	12	24
2	3	2	3	2	1	1	1	1	1	1	3	1	1	1	1	1	2	2	2	1	2	2	3	4	3	12	22
2	2	2	4	2	1	1	1	2	2	1	2	2	1	0	0	0	1	2	2	2	2	2	5	4	1	11	21
2	2	2	4	2	1	1	1	2	3	2	1	3	2	2	2	3	1	1	1	1	2	3	7	4	6	12	29
2	2	2	4	2	1	1	1	2	2	2	1	1	2	1	1	1	2	2	1	2	2	2	6	2	4	12	24
2	2	2	4	2	1	1	1	2	3	2	3	2	1	1	3	2	3	2	1	2	2	2	7	5	5	14	31
2	2	2	4	2	1	1	1	0	0	1	2	2	1	1	1	1	2	2	1	2	2	2	1	4	3	12	20
2	2	2	4	2	1	1	1	1	1	1	1	1	1	1	2	1	2	2	1	2	2	3	3	2	4	13	22
2	2	2	4	2	1	1	1	2	2	1	3	1	1	1	3	2	3	2	1	2	3	3	5	4	5	16	30
2	2	2	4	2	1	1	1	1	1	1	1	1	1	1	1	1	1	1	1	1	1	1	3	2	3	7	15
2	3	2	4	2	1	1	1	3	2	2	1	2	1	1	2	2	2	2	1	1	2	3	7	3	4	13	27
2	3	2	4	2	1	1	1	2	2	1	1	1	1	1	1	1	1	1	1	1	1	1	5	2	3	7	17
2	3	2	4	2	1	1	1	1	2	2	2	2	1	1	1	1	2	1	1	1	2	2	5	4	3	10	22
2	3	2	1	3	1	1	1	1	1	1	1	1	1	1	1	1	2	2	1	2	2	2	3	2	3	12	20
2	3	2	4	3	1	1	1	2	2	3	2	1	1	1	1	1	3	2	3	2	2	2	7	3	3	15	28
2	3	2	4	3	1	1	1	2	2	1	1	1	1	1	2	2	2	2	2	1	2	2	5	2	4	13	24
2	3	3	4	3	1	1	1	2	2	2	1	1	0	1	1	1	1	1	1	1	1	1	6	2	2	7	17
2	2	2	4	4	1	1	1	3	2	2	1	1	1	1	2	1	2	2	1	2	2	2	7	2	4	12	25
2	1	2	4	5	1	1	1	2	2	1	2	2	2	2	2	1	1	1	1	1	2	2	5	4	6	9	24
2	1	1	4	6	1	1	1	2	2	2	2	0	1	2	2	0	2	2	2	1	2	2	6	2	5	11	24
2	1	2	4	6	1	1	1	2	2	2	2	1	1	1	1	1	2	1	1	1	2	3	6	3	3	11	23
2	2	2	1	2	1	2	1	1	2	0	2	1	2	1	1	1	2	1	1	2	1	2	3	3	4	10	20
2	3	2	1	2	1	2	1	1	1	1	1	1	1	1	2	1	2	2	1	2	2	2	3	2	4	12	21
2	1	2	4	1	2	1	1	2	2	2	1	2	2	2	1	2	2	2	2	1	2	3	6	3	5	14	28
2	1	2	4	1	2	1	1	2	3	2	2	1	1	1	2	2	2	2	2	2	2	2	7	3	4	14	28
2	2	2	4	1	2	1	1	2	2	1	1	1	1	1	1	1	1	2	1	2	2	2	5	2	3	11	21
2	2	2	3	2	2	1	1	2	2	3	2	2	2	2	3	1	2	2	1	2	3	3	7	4	7	14	32
2	3	2	3	2	2	1	1	2	2	2	2	2	1	1	1	1	3	3	1	3	3	3	6	4	3	17	30
2	1	2	4	2	2	1	1	3	1	2	1	0	2	1	1	1	2	2	2	2	2	2	6	1	4	13	24
2	1	2	4	2	2	1	1	2	2	1	3	1	2	0	3	2	3	2	1	1	2	2	5	4	5	13	27
2	1	2	4	2	2	1	1	2	2	1	1	2	1	2	1	1	2	2	2	2	3	3	5	3	4	15	27
2	2	2	4	2	2	1	1	2	2	2	1	1	1	1	1	1	2	2	1	2	2	2	6	2	3	12	23
2	2	2	4	2	2	1	1	2	2	2	1	1	1	1	1	2	2	2	1	2	2	2	6	2	3	13	24
2	2	2	4	2	2	1	1	2	2	2	2	1	1	1	2	1	2	2	1	1	2	2	6	3	4	11	24
2	2	2	4	2	2	1	1	2	2	2	1	1	1	1	2	1	2	2	1	1	1	2	6	2	4	10	22
2	2	2	4	2	2	1	1	2	2	2	2	1	2	1	1	2	2	1	1	1	2	2	6	3	4	11	24
2	2	2	4	2	2	1	1	2	2	1	2	1	1	1	3	2	2	2	2	2	3	3	5	3	5	16	29
2	3	2	4	2	2	1	1	2	2	1	1	1	1	1	1	2	2	2	0	2	2	2	5	2	3	12	22
2	3	2	4	2	2	1	1	1	1	1	1	0	0	0	1	1	1	1	1	1	1	1	3	1	1	7	12
2	3	2	4	2	2	1	1	2	2	1	3	1	1	1	3	2	3	2	1	2	3	3	5	4	5	16	30
2	3	2	4	2	2	1	1	2	2	2	1	1	1	1	2	1	1	1	1	2	2	2	6	2	4	10	22
2	2	2	4	5	2	1	1	2	2	3	2	2	2	2	3	2	2	2	2	3	3	3	7	4	7	17	35
2	2	2	4	5	2	1	1	2	2	2	2	1	2	2	2	1	2	2	1	2	2	2	6	3	6	12	27
2	1	1	3	6	2	1	1	2	2	2	1	1	2	2	2	1	2	2	1	2	2	2	6	2	6	12	26
2	2	2	4	2	2	2	1	2	2	2	2	1	1	1	2	1	1	2	1	1	2	2	6	3	4	10	23
2	3	2	4	2	2	2	1	3	2	1	1	1	1	1	1	1	2	2	1	1	2	2	6	2	3	11	22
2	1	2	4	1	3	1	1	2	2	2	2	1	1	1	2	2	2	1	1	2	2	2	6	3	4	12	25
2	2	2	4	2	3	1	1	1	1	1	2	1	1	1	1	1	1	1	1	1	1	1	3	3	3	7	16
2	1	1	4	5	3	1	1	2	2	2	3	1	1	1	3	2	2	2	2	2	2	3	6	4	5	15	30
2	1	2	4	5	3	1	1	2	2	1	1	0	1	2	2	0	2	3	2	1	1	1	5	1	5	10	21
2	1	1	1	1	1	1	2	1	1	1	0	0	1	1	1	1	1	1	1	1	1	1	3	0	3	7	13
2	1	1	4	1	1	1	2	2	3	1	2	2	1	1	2	1	1	2	1	2	2	2	6	4	4	11	25
2	1	2	4	1	1	1	2	1	1	1	2	2	0	0	0	2	2	2	2	2	2	2	3	4	0	14	21
2	1	2	4	1	1	1	2	2	2	2	2	2	1	1	1	2	2	2	1	1	2	2	6	4	3	12	25
2	1	2	4	1	1	1	2	2	2	2	2	2	1	1	1	1	1	2	1	2	2	2	6	4	3	11	24
2	1	2	4	1	1	1	2	2	2	3	2	2	2	2	2	1	2	2	2	1	2	2	7	4	6	12	29
2	1	2	4	1	1	1	2	2	2	1	3	1	1	1	1	3	2	2	0	2	2	3	5	4	3	14	26
2	1	2	4	1	1	1	2	2	2	1	1	1	1	1	2	2	2	2	1	2	2	2	5	2	4	13	24
2	1	2	4	1	1	1	2	3	2	1	2	2	1	1	1	1	1	1	1	1	1	1	6	4	3	7	20
2	2	2	4	1	1	1	2	2	2	2	1	1	1	1	3	2	2	3	1	1	1	1	6	2	5	11	24
2	3	2	4	1	1	1	2	1	1	0	2	2	2	1	1	1	1	1	1	2	3	3	2	4	4	12	22
2	2	3	4	1	1	1	2	2	2	3	0	0	0	0	0	1	2	2	2	2	2	2	7	0	0	13	20
2	2	3	3	2	1	1	2	2	3	2	3	1	1	2	3	2	2	2	2	2	2	3	7	4	6	15	32
2	2	1	4	2	1	1	2	3	2	2	2	3	1	3	3	1	3	2	2	2	3	3	7	5	7	16	35
2	1	2	4	2	1	1	2	2	2	2	2	3	2	2	3	1	2	2	2	2	3	2	6	5	7	14	32
2	1	2	4	2	1	1	2	2	2	3	2	2	2	2	2	1	2	2	2	2	2	2	7	4	6	13	30
2	3	2	4	2	1	1	2	2	2	2	1	1	1	1	1	1	2	2	1	2	2	2	6	2	3	12	23
2	3	2	4	2	1	1	2	3	2	2	2	1	1	1	1	1	2	2	1	2	3	3	7	3	3	14	27
2	3	2	4	2	1	1	2	2	2	3	1	1	2	2	2	2	3	2	1	2	2	2	7	2	6	14	29
2	3	2	4	2	1	1	2	2	2	2	1	1	1	1	1	2	2	2	2	1	2	2	6	2	3	13	24
2	3	2	4	2	1	1	2	2	3	3	2	2	2	2	2	1	2	2	1	1	2	2	8	4	6	11	29
2	3	2	4	2	1	1	2	2	2	1	2	1	1	1	2	2	2	1	1	2	2	2	5	3	4	12	24
2	3	2	3	3	1	1	2	1	1	1	1	1	1	1	1	1	2	2	1	2	2	3	3	2	3	13	21
2	1	1	4	5	1	1	2	2	2	1	2	1	1	0	2	1	2	2	0	2	2	2	5	3	3	11	22
2	1	2	4	5	1	1	2	1	3	2	1	1	2	2	2	2	2	2	1	2	2	3	6	2	6	14	28
2	1	1	4	6	1	1	2	2	2	2	2	2	2	2	3	1	2	2	1	2	2	2	6	4	7	12	29
2	1	1	4	6	1	1	2	1	2	2	1	1	2	1	3	1	2	2	1	2	2	3	5	2	6	13	26
2	2	1	4	6	1	1	2	2	2	1	3	1	1	1	1	1	2	2	1	1	1	2	5	4	3	10	22
2	1	2	4	1	1	2	2	2	2	2	1	2	2	2	2	3	2	1	1	1	1	2	6	3	6	11	26
2	1	2	4	1	1	2	2	1	2	2	2	1	2	1	3	1	2	2	1	2	2	2	5	3	6	12	26
2	2	2	3	2	1	2	2	1	1	2	1	2	1	1	1	1	2	1	1	2	2	2	4	3	3	11	21
2	2	3	3	2	1	2	2	2	2	2	2	1	1	1	3	2	1	1	1	1	1	2	6	3	5	9	23
2	1	1	4	6	1	2	2	2	2	1	1	1	1	1	1	1	2	2	1	1	2	2	5	2	3	11	21
2	1	1	4	1	2	1	2	2	2	2	2	2	2	1	2	2	1	1	1	2	2	2	6	4	5	11	26
2	1	1	4	1	2	1	2	2	2	2	2	1	2	1	2	1	2	2	2	2	2	3	6	3	5	14	28
2	1	2	4	1	2	1	2	2	2	2	3	3	0	0	2	1	2	2	1	1	3	3	6	6	2	13	27
2	1	2	4	1	2	1	2	2	2	3	1	1	1	1	1	1	2	2	1	2	2	2	7	2	3	12	24
2	1	2	4	1	2	1	2	2	2	2	2	2	2	2	2	1	2	2	0	2	2	2	6	4	6	11	27
2	1	2	4	1	2	1	2	2	2	2	1	1	1	1	2	1	1	2	1	1	2	2	6	2	4	10	22
2	2	2	4	1	2	1	2	3	3	2	2	3	1	1	3	1	3	2	1	3	3	3	8	5	5	16	34
2	2	2	3	2	2	1	2	0	0	1	2	2	2	2	3	1	2	2	2	2	2	2	1	4	7	13	25
2	2	2	3	2	2	1	2	2	2	3	3	2	2	2	3	1	2	2	1	2	2	2	7	5	7	12	31
2	2	3	3	2	2	1	2	2	2	2	1	1	1	1	2	2	1	1	1	1	2	1	6	2	4	9	21
2	1	2	4	2	2	1	2	2	2	2	3	1	1	1	3	1	2	2	1	2	2	3	6	4	5	13	28
2	1	2	4	2	2	1	2	1	2	1	1	1	2	1	1	1	3	2	1	2	3	3	4	2	4	15	25
2	2	2	4	2	2	1	2	2	2	2	1	2	1	2	2	2	2	2	1	1	2	2	6	3	5	12	26
2	2	2	4	2	2	1	2	3	3	3	3	1	1	1	1	1	2	2	2	3	2	3	9	4	3	15	31
2	2	2	4	2	2	1	2	2	2	1	2	1	1	1	1	1	1	2	1	1	2	2	5	3	3	10	21
2	2	2	4	2	2	1	2	2	2	3	1	1	3	1	1	2	3	3	3	2	3	3	7	2	5	19	33
2	2	2	4	2	2	1	2	2	2	2	3	1	1	1	3	1	2	2	1	2	2	3	6	4	5	13	28
2	2	2	4	2	2	1	2	2	2	1	2	1	1	1	2	1	2	2	1	2	2	2	5	3	4	12	24
2	1	1	4	5	2	1	2	2	2	2	2	2	1	1	1	1	2	1	1	1	2	2	6	4	3	10	23
2	1	2	4	5	2	1	2	1	2	2	1	1	2	2	2	1	2	2	1	2	2	2	5	2	6	12	25
2	1	2	4	5	2	1	2	2	2	1	1	1	1	1	1	1	2	2	2	2	2	2	5	2	3	13	23
2	1	1	3	6	2	1	2	1	2	1	2	2	2	1	2	2	2	2	1	2	2	2	4	4	5	13	26
2	1	1	4	6	2	1	2	2	2	3	2	2	2	2	2	1	3	3	2	2	2	2	7	4	6	15	32
2	1	1	4	6	2	1	2	2	2	2	1	1	1	1	1	1	1	3	1	2	2	3	6	2	3	13	24
2	1	1	4	6	2	1	2	2	2	3	2	2	2	2	3	2	2	2	2	2	2	3	7	4	7	15	33
2	1	1	4	6	2	1	2	2	2	2	0	2	1	1	1	1	2	1	1	2	3	3	6	2	3	13	24
2	2	1	4	6	2	1	2	2	2	1	2	1	1	0	1	1	2	2	1	2	2	3	5	3	2	13	23
2	1	1	4	6	2	2	2	3	3	2	3	2	1	1	2	1	2	2	1	2	2	3	8	5	4	13	30
2	1	1	4	1	3	1	2	1	1	1	1	1	2	2	2	1	1	1	1	1	1	1	3	2	6	7	18
2	1	1	4	1	3	1	2	2	2	2	3	1	1	1	3	1	2	3	1	2	3	3	6	4	5	15	30
2	1	2	4	1	3	1	2	2	2	1	2	2	1	2	1	1	1	1	2	1	1	2	5	4	4	9	22
2	1	2	4	1	3	1	2	3	2	1	2	1	1	1	3	1	3	2	2	2	2	2	6	3	5	14	28
2	1	2	4	1	3	1	2	2	2	2	2	2	1	1	2	1	2	2	1	1	2	2	6	4	4	11	25
2	1	2	4	1	3	1	2	2	2	2	2	1	1	1	1	1	2	2	1	1	2	1	6	3	3	10	22
2	1	2	4	1	3	1	2	2	2	1	2	1	1	1	1	1	3	3	2	2	2	2	5	3	3	15	26
2	1	2	4	1	3	1	2	2	2	1	2	1	1	1	1	2	2	2	2	2	2	2	5	3	3	14	25
2	2	2	4	1	3	1	2	2	2	3	2	2	2	1	2	1	2	2	1	2	2	2	7	4	5	12	28
2	2	2	4	1	3	1	2	2	2	2	2	0	2	2	2	0	2	2	1	1	2	3	6	2	6	11	25
2	2	2	3	2	3	1	2	2	2	2	1	1	2	2	2	1	1	1	1	1	1	1	6	2	6	7	21
2	2	2	3	2	3	1	2	3	2	2	3	2	1	2	1	1	2	2	1	3	2	2	7	5	4	13	29
2	1	2	4	2	3	1	2	2	2	1	2	2	2	2	2	2	3	2	2	2	2	3	5	4	6	16	31
2	1	2	4	2	3	1	2	2	2	3	1	1	1	1	2	1	2	2	1	1	2	2	7	2	4	11	24
2	2	2	4	2	3	1	2	2	2	3	1	1	2	2	3	1	2	2	1	2	2	3	7	2	7	13	29
2	2	2	4	2	3	1	2	1	1	1	0	0	0	0	0	1	1	1	1	1	1	1	3	0	0	7	10
2	2	2	4	2	3	1	2	3	2	2	1	1	1	1	1	1	2	2	2	1	3	3	7	2	3	14	26
2	1	1	4	5	3	1	2	2	2	2	2	2	1	1	3	1	2	2	3	2	2	2	6	4	5	14	29
2	2	1	4	5	3	1	2	2	2	3	3	2	2	2	2	2	2	2	2	2	2	3	7	5	6	15	33
2	1	2	4	5	3	1	2	2	2	2	1	0	2	2	2	1	2	2	2	2	2	2	6	1	6	13	26
2	1	2	4	5	3	1	2	2	2	1	1	1	2	2	2	1	2	2	1	2	2	2	5	2	6	12	25
2	2	2	4	5	3	1	2	2	2	2	1	0	1	0	1	1	2	2	1	2	2	2	6	1	2	12	21
2	1	1	3	6	3	1	2	1	1	1	1	1	1	1	0	0	0	1	1	1	1	1	3	2	2	5	12
2	1	1	4	6	3	1	2	3	2	2	1	1	1	0	1	1	2	2	2	2	3	2	7	2	2	14	25
2	1	1	4	6	3	1	2	2	2	1	1	1	1	1	1	1	3	2	1	2	2	2	5	2	3	13	23
2	1	2	4	6	3	1	2	2	2	2	2	0	0	0	2	1	2	2	1	1	2	2	6	2	2	11	21
